# Supplementary material
Source: MDPI journal article supplement (https://www.mdpi.com/2227-7390/10/16/3021)
Supplement: s1 [file s1]

## ANNEX 1

Scoring rubric designed considering the provided competency model and ranked by adapting the Miller pyramid of assessment<sup>1</sup> to the case of a mathematical practice situation. Please note that Miller index cannot be applied to the emotional dimension. Note also that an additional “don’t know” level has been included to provide a full picture of the performance of each student.

| Dimension  | Item                   | Ranking                                       |                                                            |                                                                 |                                                 |                                                           |
|------------|------------------------|-----------------------------------------------|------------------------------------------------------------|-----------------------------------------------------------------|-------------------------------------------------|-----------------------------------------------------------|
|            |                        | (1) Don't know                                | (2) Know                                                   | (3) Explains                                                    | (4) Demonstrates                                | (5) Does                                                  |
| Cognitive  | Language               | Do not use appropriate mathematic language    | Knows technical language when used                         | Knows and explains technical language                           | Knows, explains and uses technical language     |                                                           |
|            | Modelling              | Do not know how to make a math model          | Know how to translate a specific situation to a math model | Knows and explains how to translate a situation to a math model | Knows, explains and design mathematical models. | Knows, explains, design and apply mathematical models.    |
|            | Thinking and reasoning | Do not identify the variables to be discussed | Identifies variables and the aim of a problem              | (...) and explain to the peers                                  | (...) and applies to solve the problem          | (...) and validates the result                            |
| Procedural | Use of tools           | Do not relate provided tools with the problem | Relates provided tools with the problem                    | (...) and explain its use to the peers                          | (...) and applies to solve the problem          | (...) and successfully use the tool                       |
|            | Strategy development   | Do not manage or try to design a strategy     | Identifies a strategy to be applied to the problem         | (...) and explain to the peers                                  | (...) and discuss the validity of a strategy    | (...) and validates the strategy by applying to a problem |
| Emotional  | Productive disposition | Do not participate on the experience          | Intermittent participation on the experience               | Actively participates on the experience                         | (...) and motivate the others to participate    |                                                           |

<sup>1</sup> Miller G.E. *The assessment of Clinical Skills/Competence/Performance*; Acad. Med. 1990: 65(9), 63-67

## ANNEX 2

Rubric designed to assess the didactic knowledge of the involved student-teachers. Note that this rubric was combined with the annex 1 rubric to provide a wide view of the didactic-mathematical knowledge of the involved student teachers.

| Dimension | Item                                  | Ranking                                                                                         |                                                                                                               |                                                                      |                                                                             |                                                      |
|-----------|---------------------------------------|-------------------------------------------------------------------------------------------------|---------------------------------------------------------------------------------------------------------------|----------------------------------------------------------------------|-----------------------------------------------------------------------------|------------------------------------------------------|
|           |                                       | (1) Don't know                                                                                  | (2) Know                                                                                                      | (3) Explains                                                         | (4) Demonstrates                                                            | (5) Does                                             |
| Didactic  | Classroom management                  | Knows no methodologies or strategies to manage conflicts                                        | Theoretical know of some strategies to manage conflicts.                                                      |                                                                      | Knows and successfully applies strategies to solve conflicts.               |                                                      |
|           | Identifying and managing difficulties | Does not know conventional difficulties that student faces when learning about a specific topic | Knows (at a theoretical level) conventional difficulties that student faces                                   | (...) and explain to the instructor                                  | (...) and identifies such difficulties in a practical situation             | (...) and provides a way to manage such difficulties |
|           | Connectivity                          | Fails to connect mathematic knowledge with other fields                                         | Knows real applications of the mathematic knowledge used (others than the presented on the situation-problem) |                                                                      | (...) and connects the learning process with other non-mathematic phenomena |                                                      |
|           | Context fitting                       | Fails to re-contextualize knowledge                                                             | Knows what and how the student has to learn from a situation-problem                                          | (...) and boosts the "discovering and learning" stage of the student | (...) and closes the cycle by de-contextualizing knowledge                  |                                                      |

# ANNEX 3

Experimental data obtained with the rubrics of annex 1 (1=don't know, 5=does).

|      |     |       | Competences |           |            |       |           |             |
|------|-----|-------|-------------|-----------|------------|-------|-----------|-------------|
|      |     |       | Cognitive   |           | Procedural |       | Emotional |             |
|      |     |       | Language    | Modelling | Thinking   | Tools | Strategy  | Disposition |
| E.P. | G01 | ABN01 | 2           | 2         | 3          | 3     | 2         | 3           |
|      |     | ABN02 | 3           | 3         | 4          | 4     | 3         | 4           |
|      |     | ABN03 | 3           | 3         | 3          | 3     | 3         | 4           |
|      |     | ABN04 | 3           | 3         | 4          | 4     | 4         | 4           |
|      | G02 | ABN05 | 3           | 4         | 4          | 4     | 4         | 4           |
|      |     | ABN06 | 4           | 5         | 4          | 4     | 3         | 4           |
|      |     | ABN07 | 3           | 2         | 2          | 4     | 3         | 4           |
|      |     | ABN08 | 4           | 4         | 3          | 4     | 4         | 4           |
|      |     | ABN09 | 4           | 3         | 2          | 4     | 2         | 4           |
|      | G03 | ABN10 | 4           | 4         | 3          | 3     | 4         | 4           |
|      |     | ABN11 | 2           | 3         | 3          | 4     | 3         | 3           |
|      |     | ABN12 | 2           | 3         | 3          | 4     | 3         | 3           |
|      |     | ABN13 | 3           | 3         | 3          | 3     | 3         | 3           |
|      |     | ABN14 | 4           | 4         | 3          | 5     | 4         | 4           |
|      | G04 | ABN15 | 4           | 5         | 4          | 5     | 5         | 4           |
|      |     | ABN16 | 3           | 4         | 3          | 3     | 3         | 3           |
|      |     | ABN17 | 4           | 4         | 4          | 5     | 3         | 4           |
|      |     | ABN18 | 4           | 4         | 3          | 4     | 4         | 4           |
|      |     | ABN19 | 4           | 4         | 4          | 4     | 5         | 4           |
|      | G05 | ABN20 | 3           | 3         | 3          | 4     | 3         | 3           |
|      |     | ABN21 | 2           | 3         | 3          | 4     | 2         | 3           |
|      |     | ABN22 | 2           | 2         | 2          | 4     | 2         | 2           |
|      |     | ABN23 | 4           | 3         | 3          | 3     | 3         | 4           |
| E.P. | G06 | CBC01 | 4           | 3         | 2          | 4     | 3         | 3           |
|      |     | CBC02 | 3           | 2         | 3          | 4     | 3         | 3           |
|      |     | CBC03 | 3           | 3         | 4          | 3     | 4         | 4           |
|      |     | CBC04 | 3           | 3         | 2          | 3     | 3         | 3           |
|      |     | CBC05 | 2           | 3         | 2          | 2     | 2         | 2           |
|      | G06 | CBC06 | 2           | 3         | 3          | 4     | 3         | 4           |
|      |     | CBC07 | 4           | 3         | 4          | 3     | 3         | 4           |
|      |     | CBC08 | 3           | 2         | 3          | 4     | 3         | 4           |
|      |     | CBC09 | 2           | 3         | 2          | 2     | 2         | 3           |
|      |     | CBC10 | 3           | 3         | 2          | 4     | 3         | 4           |
|      | G07 | CBC11 | 4           | 3         | 4          | 3     | 3         | 4           |
|      |     | CBC12 | 4           | 3         | 3          | 4     | 3         | 4           |
|      |     | CBC13 | 3           | 2         | 2          | 3     | 3         | 4           |
|      |     | CBC14 | 3           | 3         | 3          | 3     | 3         | 3           |
|      |     | CBC15 | 4           | 3         | 3          | 3     | 3         | 4           |
|      | G08 | CBC16 | 4           | 4         | 5          | 5     | 4         | 4           |
|      |     | CBC17 | 3           | 2         | 2          | 4     | 3         | 4           |
|      |     | CBC18 | 4           | 3         | 4          | 4     | 3         | 3           |
|      |     | CBC19 | 3           | 2         | 2          | 3     | 2         | 3           |
|      |     | CBC20 | 3           | 3         | 2          | 2     | 3         | 3           |
|      | G09 | CBC21 | 3           | 2         | 3          | 3     | 2         | 4           |
|      |     | CBC22 | 4           | 3         | 2          | 4     | 2         | 3           |

|        |     |     |       |   |   |   |   |   |   |
|--------|-----|-----|-------|---|---|---|---|---|---|
|        |     |     | CBC23 | 4 | 3 | 2 | 4 | 2 | 3 |
|        |     |     | CBC24 | 3 | 2 | 3 | 2 | 3 | 4 |
|        |     |     | CBC25 | 3 | 2 | 2 | 3 | 2 | 3 |
|        |     | G10 | CBC26 | 2 | 3 | 3 | 2 | 3 | 4 |
|        |     |     | CBC27 | 2 | 3 | 3 | 3 | 2 | 3 |
|        |     |     | CBC28 | 3 | 3 | 4 | 4 | 2 | 3 |
|        |     |     | CBC29 | 4 | 2 | 3 | 4 | 3 | 3 |
|        |     | G11 | CBC30 | 4 | 3 | 4 | 5 | 3 | 3 |
|        |     |     | CBC31 | 4 | 2 | 3 | 4 | 2 | 4 |
|        |     |     | CBC32 | 3 | 2 | 2 | 3 | 2 | 3 |
|        |     |     | CBC33 | 3 | 3 | 3 | 4 | 3 | 4 |
|        |     |     | CBC34 | 3 | 3 | 4 | 4 | 3 | 4 |
| E.S.O. | G12 |     | CBC35 | 3 | 3 | 2 | 2 | 2 | 2 |
|        |     |     | CBC36 | 3 | 4 | 4 | 4 | 3 | 4 |
|        |     |     | CBC37 | 4 | 5 | 4 | 4 | 4 | 4 |
|        |     |     | CBC38 | 3 | 3 | 2 | 3 | 2 | 3 |
|        |     |     | CBC39 | 3 | 3 | 3 | 3 | 3 | 3 |
|        | G13 |     | CBC40 | 3 | 2 | 3 | 3 | 2 | 4 |
|        |     |     | CBC41 | 4 | 3 | 2 | 4 | 2 | 3 |
|        |     |     | CBC42 | 4 | 3 | 2 | 4 | 2 | 3 |
|        |     |     | CBC43 | 3 | 2 | 3 | 2 | 3 | 4 |
|        |     |     | CBC44 | 3 | 2 | 2 | 3 | 2 | 3 |
|        | G14 |     | CBC45 | 3 | 3 | 3 | 3 | 3 | 3 |
|        |     |     | CBC46 | 4 | 5 | 4 | 4 | 3 | 4 |
|        |     |     | CBC47 | 3 | 4 | 3 | 3 | 4 | 3 |
|        |     |     | CBC48 | 3 | 3 | 3 | 3 | 4 | 4 |
|        |     |     | CBC49 | 3 | 3 | 2 | 3 | 2 | 3 |
|        | G15 |     | CBC50 | 2 | 3 | 3 | 3 | 4 | 3 |
|        |     |     | CBC51 | 3 | 3 | 4 | 5 | 4 | 4 |
|        |     |     | CBC52 | 4 | 3 | 3 | 4 | 3 | 3 |
|        |     |     | CBC53 | 5 | 4 | 4 | 4 | 4 | 3 |
|        | G16 |     | CBC54 | 4 | 3 | 2 | 3 | 2 | 3 |
|        |     |     | CBC55 | 3 | 3 | 3 | 3 | 2 | 3 |
|        |     |     | CBC56 | 3 | 2 | 3 | 3 | 3 | 4 |
|        |     |     | CBC57 | 3 | 2 | 2 | 4 | 3 | 3 |
|        |     |     | CBC58 | 2 | 3 | 3 | 4 | 4 | 4 |
